# Supplementary material for: Distinct myocardial lineages break atrial symmetry during cardiogenesis in zebrafish
Source: eLife. 2018 May 15;7:e32833. doi: 10.7554/eLife.32833 (PMC5953537; doi:10.7554/eLife.32833)
Supplement: Figure 6—source data 1. [file elife-32833-fig6-data1.xlsx]

## Sheet: Sheet1
			Guerra et al., Distinct myocardial lineages break atrial symmetry during cardiogenesis in zebrafish
			Figure 6 - Source Data 2
			3mpf meis2b+/+
				Atrial cardiomyocytes	Proliferating cardiomyocytes	% proliferating cardiomyocytes
			1	17002	375	2.20562
			2	23653	1470	6.21486
			3	6431	103	1.60162
			4	15018	272	1.81116
			5	6622	169	2.5521
			6	10896	352	3.23054
			7	11941	317	2.65472
			8	5714	113	1.9776
					average	2.78103
					st dev	1.48179
					st err	0.493929
			3mpf meis2b-/-
				Atrial cardiomyocytes	Proliferating cardiomyocytes	% proliferating cardiomyocytes
			1	9528	707	7.42024
			2	11141	1883	16.9015
			3	7767	665	8.56186
			4	7700	871	11.3117
			5	11152	1033	9.26291
			6	7635	619	8.1074
			7	8879	991	11.1612
			8	9965	737	7.39589
					average	10.0153
					st dev	3.16968
					st err	1.12065
					+/+	-/-
				% Proliferating Atrial CM	2.78103	10.0153
				Standard Dev	1.48179	3.16968
