# Supplementary material for: Distinct myocardial lineages break atrial symmetry during cardiogenesis in zebrafish
Source: eLife. 2018 May 15;7:e32833. doi: 10.7554/eLife.32833 (PMC5953537; doi:10.7554/eLife.32833)
Supplement: Figure 7—source data 2. [file elife-32833-fig7-data2.xlsx]

## Sheet: Sheet1
	IgG
	E12 IgG				E12 Input
	Hoxa5	Myh6	Pitx2 - 1	Pitx2 . 2	Hoxa5	Myh6	Pitx2 - 1	Pitx2 - 2
Ct of technical replicate 1	35.3523	35.397	35.2894	34.8834	22.5471	22.4444	22.4951	22.8079
Ct of technical replicate 2		33.0307	34.3079	35.043	22.5701	22.2816	22.3588	22.5684
Ct of technical replicate 3	33.6994	33.7894	33.1471		22.714	22.5461	22.4802	22.8192
	Biological replicate 1
	E12 IP				E12 Input
	Hoxa5	Myh6	Pitx2 - 1	Pitx2 . 2	Hoxa5	Myh6	Pitx2 - 1	Pitx2 - 2
Ct of technical replicate 1	30.2693	33.0292	31.2926	31.0505	21.8964	21.6434	21.8331	22.1981
Ct of technical replicate 2	30.6903	35.1657	31.396	31.3257	21.9046	21.6338	21.85	22.1207
Ct of technical replicate 3	30.4565	33.8862	31.4609	31.7346	22.133	22.0932	21.7618	22.1858
Ct of technical replicate 4	30.1344	35.7332	30.8993	31.9725	21.8867	21.753	21.6767	22.0592
Ct of technical replicate 5	30.4634	34.379	30.7837	31.132	22.1058	21.6538	21.6421	22.0348
Ct of technical replicate 6	29.9209	34.0488	31.3475	31.3375	21.9962	21.823	21.8869	22.1603
	Biological replicate 2
	E12 IP				E12 Input
	Hoxa5	Myh6	Pitx2 - 1	Pitx2 . 2	Hoxa5	Myh6	Pitx2 - 1	Pitx2 - 2
Ct of technical replicate 1	30.4929	35.6577	31.3336	32.5691	22.4683	22.2702	22.3168	22.655
Ct of technical replicate 2	30.0407		32.4718	32.0889	22.3806	22.1567	22.2076	22.437
Ct of technical replicate 3	30.5801	35.2632	31.1473	31.4795	22.7408	22.4228	22.2907	22.6886
Ct of technical replicate 4	30.28	34.09	31.14	31.09	22.42	22.09	22.12	22.72
Ct of technical replicate 5	29.79	34.5	31.09	31.43	22.52	22.25	22.04	22.39
Ct of technical replicate 6	30.48	33.97	31.37	31.1	22.36	22.15	22.16	22.59
	Biological replicate 3
	E12 IP				E12 Input
Ct of technical replicate 1	31.4282		31.7727	34.0644	22.402	22.2665	22.2217	22.6305
Ct of technical replicate 2	31.6903	35.2041	32.573	31.5137	22.7072	22.2234	22.1486	22.4514
Ct of technical replicate 3	31.6359	34.7735	32.4275	31.4833	22.4182	22.3122	22.2425	22.617
	Biological replicate 4
	E12 IP				E12 Input
	Hoxa5	Myh6	Pitx2 - 1	Pitx2 . 2	Hoxa5	Myh6	Pitx2 - 1	Pitx2 - 2
Ct of technical replicate 1	31.1038	35.0022	32.1091	31.3423	22.2838	22.1389	22.0852	22.4635
Ct of technical replicate 2	31.6167	32.962	31.3479	31.7427	22.2023	22.0383	22.0469	22.3252
Ct of technical replicate 3	30.6677	34.8749	31.0195	31.7962	22.3686	22.2408	22.1371	22.4327
Ct of technical replicate 4	30.8593	34.0316	31.9082	31.4456	22.122	21.9422	22.0141	22.651
Ct of technical replicate 5	30.1569	36.0169	32.3187	31.6157	22.4697	22.0494	22.0404	22.3436
Ct of technical replicate 6	30.5532		30.6493	30.9079	22.2237	22.1385	22.1075	22.4681
